# Supplementary material for: Machine Learning to Predict Quasicrystals from Chemical Compositions
Source: PubMed Central journal article supplement (PMC11468293; doi:10.1002/adma.202102507), 2021-07-19
Supplement: ADMA-33-2102507-s001.pdf [file ADMA-33-2102507-s001.pdf]

# ADVANCED MATERIALS

## Supporting Information

for *Adv. Mater.*, DOI: 10.1002/adma.202102507

Machine Learning to Predict Quasicrystals from  
Chemical Compositions

*Chang Liu, Erina Fujita, Yukari Katsura, Yuki Inada,  
Asuka Ishikawa, Ryuji Tamura, Kaoru Kimura,\* and Ryo  
Yoshida\**

## Supplementary Note

# Machine learning to predict quasicrystals from chemical compositions

*Chang Liu Erina Fujita Yukari Katsura Yuki Inada Asuka Ishikawa Ryuji Tamura Kaoru Kimura\* Ryo Yoshida\**

C. Liu, R. Yoshida

Research Organization of Information and Systems, The Institute of Statistical Mathematics, Tachikawa, 190-8562, Japan

E. Fujita, Y. Katsura, Y. Inada, K. Kimura

The University of Tokyo, Department of Advanced Materials Science, Kashiwa, 277-8561, Japan

A. Ishikawa, R. Tamura

Tokyo University of Science, Department of Materials Science and Technology, Tokyo, 125-8585, Japan

R. Yoshida

National Institute for Materials Science, Research and Service Division of Materials Data and Integrated System, Tsukuba, 305-0047, Japan

R. Yoshida

The Graduate University for Advanced Studies, Department of Statistical Science, Tachikawa, 190-8562, Japan

R. Yoshida

Email Address: [yoshidar@ism.ac.jp](mailto:yoshidar@ism.ac.jp)

K. Kimura

Email Address: [bkimura@phys.mm.t.u-tokyo.ac.jp](mailto:bkimura@phys.mm.t.u-tokyo.ac.jp)

## Quasicrystals and approximants used in the supervised learning

Table S1: List of quasicrystals and approximants that were used in the supervised learning. Each column gives the chemical composition, the label indicating quasicrystal or approximant (QC and AC), structure type, the known space group, and the guessed space group, respectively. The data were collected from the Crystallography of Quasicrystals handbook [1].

| Composition             | QC or AP    | Type        | Space group | Guessed space group |
|-------------------------|-------------|-------------|-------------|---------------------|
| Cr 5 Ni 3 Si 2          | QC          | Octagonal   |             | I8_4/mcm            |
| Mn 4 Si 1               | QC          | Octagonal   |             | I8_4/mcm            |
| Mn 82 Si 15 Al 3        | QC          | Octagonal   | I8_4/mcm    | I8_4/mcm            |
| Zn 58 Mg 40 Dy 2        | QC          | Decagonal   |             | P10_5/mmc           |
| Zn 58 Mg 40 Dy 2        | QC          | Decagonal   |             | P10_5/mmc           |
| Zn 58 Mg 40 Er 2        | QC          | Decagonal   |             | P10_5/mmc           |
| Zn 58 Mg 40 Ho 2        | QC          | Decagonal   |             | P10_5/mmc           |
| Zn 58 Mg 40 Lu 2        | QC          | Decagonal   |             | P10_5/mmc           |
| Zn 58 Mg 40 Tm 2        | QC          | Decagonal   |             | P10_5/mmc           |
| Zn 58 Mg 40 Y 2         | QC          | Decagonal   |             | P10_5/mmc           |
| Al 70 Ni 15 Fe 15       | QC          | Decagonal   |             | P10_5/mmc           |
| Al 65 Cu 15 Rh 20       | QC          | Decagonal   |             | P10_5/mmc           |
| Al 70 Ni 20 Rh 10       | QC          | Decagonal   |             | P10_5/mmc           |
| Al 65 Cu 20 Co 15       | QC          | Decagonal   |             | P10_5/mmc           |
| Al 65 Cu 20 Ir 15       | QC          | Decagonal   |             | P10_5/mmc           |
| Al 73.2 Co 26.8         | AP          | Decagonal   | P2          | P2                  |
| Al 71.5 Co 28.5         | AP          | Decagonal   | P6_3/mmc    | P6_3/mmc            |
| Al 71.5 Co 23.6 Cu 4.9  | AP          | Decagonal   | Cm          | Cm                  |
| Al 76 Co 24             | AP          | Decagonal   | Pmn2_1      | Pmn2_1              |
| Al 74.8 Co 17.0 Ni 8.2  | AP          | Decagonal   | Immm        | Immm                |
| Al 71.8 Co 21.1 Ni 7.1  | AP          | Decagonal   | Cm          | Cm                  |
| Al 70.5 Mn 16.5 Pd 13   | QC          | Decagonal   | P10_5/mmc   | P10_5/mmc           |
| Al 40 Mn 25 Fe 15 Ge 20 | QC          | Decagonal   |             | P10_5/mmc           |
| Ga 33 Fe 46 Cu 3 Si 18  | QC          | Decagonal   |             | P10_5/mmc           |
| Ga 43 Co 47 Cu 10       | QC          | Decagonal   |             | P10_5/mmc           |
| Ga 35 V 45 Ni 6 Si 14   | QC          | Decagonal   |             | P10_5/mmc           |
| Al 75 Mn 20 Pd 5        | AP          | Decagonal   | Pnma        | Pnma                |
| Al 75 Os 10 Pd 15       | QC          | Decagonal   | P10_5/mmc   | P10_5/mmc           |
| Al 75 Ru 10 Pd 15       | QC          | Decagonal   |             | P10_5/mmc           |
| Al 73 Ir 14.5 Os 12.5   | QC          | Decagonal   | P10_c       | P10_c               |
| Al 70 Ni 20 Ru 10       | QC          | Decagonal   | P10_5/mmc   | P10_5/mmc           |
| Al 72.5 Pd 27.5         | AP 2/1, 1/1 | Decagonal   | Pna2_1      | Pna2_1              |
| Al 75 Pd 13 Ru 12       | AP 3/2, 2/1 | Decagonal   | Pna2_1      | Pna2_1              |
| Ni 70.6 Cr 29.4         | QC          | Dodecagonal |             | P(-12)m2            |
| V 3 Ni 2                | QC          | Dodecagonal |             | P(-12)m2            |
| V 15 Ni 10 Si 1         | QC          | Dodecagonal |             | P(-12)m2            |
| Ta 1.6 Te 1             | QC          | Dodecagonal | P(-12)m2    | P(-12)m2            |
| Ta 97 Te 60             | AP          | Dodecagonal | P2_12_12_1  | P2_12_12_1          |
| Ta 181 Te 112           | AP          | Dodecagonal | P2_12_12_1  | P2_12_12_1          |
| Al 65 Cu 20 Ru 15       | QC          | Icosahedral | Fm-3-5      | Fm-3-5              |
| Al 65 Cu 20 Os 15       | QC          | Icosahedral | Fm-3-5      | Fm-3-5              |
| Al 65 Cu 20 Fe 15       | QC          | Icosahedral | Fm-3-5      | Fm-3-5              |

Table S1 continued

| Composition                     | QC or AP              | Type        | Space group | Gussed space group |
|---------------------------------|-----------------------|-------------|-------------|--------------------|
| Al 70.5 Pd 21 Mn 8.5            | QC                    | Icosahedral | Fm-3-5      | Fm-3-5             |
| Al 70 Pd 20 Re 10               | QC                    | Icosahedral | Fm-3-5      | Fm-3-5             |
| Al 70 Pd 21 Tc 9                | QC                    | Icosahedral | Fm-3-5      | Fm-3-5             |
| Al 71 Pd 21 Re 8                | QC                    | Icosahedral | Pm-3-5      | Pm-3-5             |
| Al 72 Pd 17 Ru 11               | QC                    | Icosahedral | Fm-3-5      | Fm-3-5             |
| Al 72 Pd 17 Os 11               | QC                    | Icosahedral | Fm-3-5      | Fm-3-5             |
| Al 71.5 Cu 8.5 Ru 20            | AP 1/0                | Icosahedral | P2_13       | P2_13              |
| Al 55.1 Cu 14.6 Ru 20.2 Si 10.1 | AP 1/0×2 ( $\gamma$ ) | Icosahedral | Fm-3        | Fm-3               |
| Al 39 Pd 21 Fe 2                | AP 1/0×2 (c)          | Icosahedral | Fm-3        | Fm-3               |
| Al 68 Pd 20 Ru 12               | AP 1/0×2 (c)          | Icosahedral | P23         | P23                |
| Al 57.3 Cu 31.4 Ru 11.3         | AP 1/1                | Icosahedral | Pm-3        | Pm-3               |
| Al 55 Cu 25.5 Fe 12.5 Si 7      | AP 1/1                | Icosahedral | Pm-3        | Pm-3               |
| Al 40 Mn 10.1 Si 7.4            | AP 1/1                | Icosahedral | Pm-3        | Pm-3               |
| Al 67 Pd 11 Mn 14 Si 7          | AP 1/1                | Icosahedral | Pm-3        | Pm-3               |
| Al 66.6 Rh 26.1 Si 7.3          | AP 2/1                | Icosahedral | Pm-3        | Pm-3               |
| Al 70 Pd 23 Mn 6 Si 1           | AP 2/1                | Icosahedral | Pm-3        | Pm-3               |
| Zn 76 Mg 17 Hf 7                | QC                    | Icosahedral | Fm-3-5      | Fm-3-5             |
| Zn 84 Mg 7 Zr 9                 | QC                    | Icosahedral | Pm-3-5      | Pm-3-5             |
| Al 6 Cu 1 Li 3                  | QC                    | Icosahedral | Pm-3-5      | Pm-3-5             |
| Mg 43 Al 42 Pd 15               | QC                    | Icosahedral | Pm-3-5      | Pm-3-5             |
| Zn 40 Mg 39.5 Ga 25             | QC                    | Icosahedral | Pm-3-5      | Pm-3-5             |
| Zn 74 Mg 15 Ho 11               | QC                    | Icosahedral | Pm-3-5      | Pm-3-5             |
| Zn 56.8 Mg 34.6 Tb 8.7          | QC                    | Icosahedral | Fm-3-5      | Fm-3-5             |
| Zn 65 Mg 26 Ho 9                | QC                    | Icosahedral | Fm-3-5      | Fm-3-5             |
| Zn 64 Mg 25 Y 11                | QC                    | Icosahedral | Fm-3-5      | Fm-3-5             |
| Zn 55 Mg 40 Nd 5                | QC                    | Icosahedral | Pm-3-5      | Pm-3-5             |
| Zn 56.8 Mg 34.6 Dy 8.7          | QC                    | Icosahedral | Fm-3-5      | Fm-3-5             |
| Zn 77 Mg 17.5 Ti 5.5            | AP 1/1                | Icosahedral | Pm-3        | Pm-3               |
| Zn 77 Mg 18 Hf 5                | AP 1/1                | Icosahedral | Pm-3        | Pm-3               |
| Zn 77 Mg 18 Zr 5                | AP 1/1                | Icosahedral | Pm-3        | Pm-3               |
| Al 88.6 Cu 19.4 Li 50.3         | AP 1/1                | Icosahedral | Im-3        | Im-3               |
| Zn 34.6 Mg 40 Al 25.4           | AP 1/1                | Icosahedral | Im-3        | Im-3               |
| Zn 61.4 Mg 24.5 Er 14.1         | AP 2/1                | Icosahedral | F-43m       | F-43m              |
| Zn 37 Mg 46 Al 17               | AP 2/1                | Icosahedral | Pm-3        | Pm-3               |
| Zn 47.3 Mg 27 Al 10.7           | AP 2/1                | Icosahedral | Pa-3        | Pa-3               |
| Zn 73.6 Mg 2.5 Sc 11.2          | AP 2/1                | Icosahedral | Pa-3        | Pa-3               |
| Zn 40 Mg 39.5 Ga 16.4 Al 4.1    | AP 3/2-2/1-2/1        | Icosahedral | Cmc2_1      | Cmc2_1             |
| Cu 48 Sc 15 Ga 34 Mg 3          | QC                    | Icosahedral |             | Pm-3-5             |
| Cu 46 Sc 16 Al 38               | QC                    | Icosahedral |             | Pm-3-5             |
| Zn 84 Ti 8 Mg 8                 | QC                    | Icosahedral |             | Pm-3-5             |
| Zn 75 Sc 15 Ni 10               | QC                    | Icosahedral |             | Pm-3-5             |
| Zn 72 Sc 16 Cu 12               | QC                    | Icosahedral |             | Pm-3-5             |
| Zn 75 Sc 15 Co 10               | QC                    | Icosahedral |             | Pm-3-5             |
| Zn 75 Sc 15 Fe 10               | QC                    | Icosahedral |             | Pm-3-5             |
| Zn 75 Sc 15 Mn 10               | QC                    | Icosahedral |             | Pm-3-5             |
| Zn 80 Sc 15 Mg 5                | QC                    | Icosahedral | Pm-3-5      | Pm-3-5             |
| Zn 75 Sc 15 Pt 10               | QC                    | Icosahedral |             | Pm-3-5             |
| Zn 75 Sc 15 Pd 10               | QC                    | Icosahedral |             | Pm-3-5             |



Table S1 continued

| Composition             | QC or AP | Type        | Space group | Gussed space group |
|-------------------------|----------|-------------|-------------|--------------------|
| Zn 75 Sc 15 Au 10       | QC       | Icosahedral |             | Pm-3-5             |
| Zn 75 Sc 15 Ag 10       | QC       | Icosahedral |             | Pm-3-5             |
| Zn 77 Sc 8 Ho 8 Fe 7    | QC       | Icosahedral |             | Pm-3-5             |
| Zn 77 Sc 8 Er 8 Fe 7    | QC       | Icosahedral |             | Pm-3-5             |
| Zn 77 Sc 7 Tm 9 Fe 7    | QC       | Icosahedral |             | Pm-3-5             |
| Zn 56.8 Er 8.7 Mg 34.6  | QC       | Icosahedral | Fm-3-5      | Fm-3-5             |
| Zn 76 Yb 14 Mg 10       | QC       | Icosahedral |             | Fm-3-5             |
| Cd 65 Mg 20 Lu 15       | QC       | Icosahedral |             | Fm-3-5             |
| Ag 42 In 42 Yb 16       | QC       | Icosahedral | Pm-3-5      | Pm-3-5             |
| Cd 65 Mg 20 Tm 15       | QC       | Icosahedral |             | Pm-3-5             |
| Ag 42 In 42 Ca 16       | QC       | Icosahedral | Pm-3-5      | Pm-3-5             |
| Au 44.2 In 41.7 Ca 14.1 | QC       | Icosahedral | Pm-3-5      | Pm-3-5             |
| Cd 65 Mg 20 Y 15        | QC       | Icosahedral | Pm-3-5      | Pm-3-5             |
| Cd 65 Mg 20 Er 15       | QC       | Icosahedral | Fm-3-5      | Fm-3-5             |
| Cd 65 Mg 20 Ho 15       | QC       | Icosahedral | Fm-3-5      | Fm-3-5             |
| Cd 65 Mg 20 Tb 15       | QC       | Icosahedral | Fm-3-5      | Fm-3-5             |
| Cd 65 Mg 20 Dy 15       | QC       | Icosahedral | Fm-3-5      | Fm-3-5             |
| Cd 65 Mg 20 Gd 15       | QC       | Icosahedral |             | Fm-3-5             |
| Cd 84 Yb 16             | QC       | Icosahedral | Pm-3-5      | Pm-3-5             |
| Cd 65 Mg 20 Yb 15       | QC       | Icosahedral |             | Pm-3-5             |
| Cd 85 Ca 15             | QC       | Icosahedral |             | Pm-3-5             |
| Cd 65 Mg 20 Ca 15       | QC       | Icosahedral | Pm-3-5      | Pm-3-5             |
| Be 17 Ru 3              | AP 1/1   | Icosahedral |             | Im-3               |
| Ga 3.85 Ni 2.15 Hf 1    | AP 1/1   | Icosahedral |             | Im-3               |
| Ga 3.22 Ni 2.78 Zr 1    | AP 1/1   | Icosahedral |             | Im-3               |
| Ga 3.64 Ni 2.36 Sc 1    | AP 1/1   | Icosahedral |             | Im-3               |
| Ga 2.3 Cu 3.7 Sc 1      | AP 1/1   | Icosahedral |             | Im-3               |
| Ga 2.6 Cu 3.4 Lu 1      | AP 1/1   | Icosahedral |             | Im-3               |
| Zn 17 Sc 3              | AP 1/1   | Icosahedral |             | Im-3               |
| Zn 17 Yb 3              | AP 1/1   | Icosahedral |             | Im-3               |
| Ag 42.5 Ga 42.5 Yb 15   | AP 1/1   | Icosahedral |             | Im-3               |
| Au 50.5 Ga 35.9 Ca 13.6 | AP 1/1   | Icosahedral | Im-3        | Im-3               |
| Au 61.2 Sn 23.9 Dy 15.2 | AP 1/1   | Icosahedral |             | Im-3               |
| Au 62.3 Sn 23.1 Gd 14.6 | AP 1/1   | Icosahedral |             | Im-3               |
| Ag 42.2 In 42.6 Tm 15.2 | AP 1/1   | Icosahedral |             | Im-3               |
| Au 47.2 In 37.2 Gd 15.6 | AP 1/1   | Icosahedral |             | Im-3               |
| Au 12.2 In 6.3 Ca 3     | AP 1/1   | Icosahedral | Im-3        | Im-3               |
| Au 64.2 Sn 21.3 Pr 14.5 | AP 1/1   | Icosahedral |             | Im-3               |
| Au 65 Sn 20 Ce 15       | AP 1/1   | Icosahedral | Im-3        | Im-3               |
| Ag 46.4 In 39.7 Gd 13.9 | AP 1/1   | Icosahedral |             | Im-3               |
| Au 49.7 In 35.4 Ce 14.9 | AP 1/1   | Icosahedral |             | Im-3               |
| Au 60.7 Sn 25.2 Eu 14.1 | AP 1/1   | Icosahedral |             | Im-3               |
| Ag 2 In 4 Yb 1          | AP 1/1   | Icosahedral | Im-3        | Im-3               |
| Ag 46.9 In 38.7 Pr 14.4 | AP 1/1   | Icosahedral |             | Im-3               |
| Au 42 In 42 Yb 16       | AP 1/1   | Icosahedral | Ia-3        | Ia-3               |
| Cd 6 Gd 1               | AP 1/1   | Icosahedral | Im-3        | Im-3               |
| Ag 2 In 4 Ca 1          | AP 1/1   | Icosahedral | Im-3        | Im-3               |
| Ag 47.7 In 38.7 Ce 14.2 | AP 1/1   | Icosahedral |             | Im-3               |

Table S1 continued

| Composition             | QC or AP | Type        | Space group | Guessed space group |
|-------------------------|----------|-------------|-------------|---------------------|
| Cd 6 Dy 1               | AP 1/1   | Icosahedral | Im-3        | Im-3                |
| Cd 6 Y 1                | AP 1/1   | Icosahedral |             | Im-3                |
| Cd 6 Sm 1               | AP 1/1   | Icosahedral | Im-3        | Im-3                |
| Cd 6 Nd 1               | AP 1/1   | Icosahedral | Im-3        | Im-3                |
| Cd 6 Yb 1               | AP 1/1   | Icosahedral | Im-3        | Im-3                |
| Ag 42.9 In 43.6 Eu 13.5 | AP 1/1   | Icosahedral |             | Im-3                |
| Cd 6 Ca 1               | AP 1/1   | Icosahedral | Im-3        | Im-3                |
| Cd 25 Eu 4              | AP 1/1×2 | Icosahedral | Fd-3        | Fd-3                |
| Cd 19 Pr 3              | AP 1/1   | Icosahedral | Im-3        | Im-3                |
| Cd 6 Sr 1               | AP 1/1   | Icosahedral |             | Im-3                |
| Au 61.1 Ga 25.0 Ca 13.9 | AP 2/1   | Icosahedral | Pa-3        | Pa-3                |
| Au 60.3 Sn 24.6 Yb 15.1 | AP 2/1   | Icosahedral |             | Pa-3                |
| Au 61.2 Sn 24.3 Ca 14.5 | AP 2/1   | Icosahedral |             | Pa-3                |
| Au 42.9 In 41.9 Yb 15.2 | AP 2/1   | Icosahedral | Pa-3        | Pa-3                |
| Au 37 In 39.6 Ca 12.6   | AP 2/1   | Icosahedral | Pa-3        | Pa-3                |
| Ag 41.7 In 43.2 Yb 15.1 | AP 2/1   | Icosahedral | Pa-3        | Pa-3                |
| Au 61.2 Sn 24.5 Eu 14.3 | AP 2/1   | Icosahedral |             | Pa-3                |
| Ag 41 In 44 Yb 15       | AP 2/1   | Icosahedral |             | Pa-3                |
| Ag 42 In 45 Ca 13       | AP 2/1   | Icosahedral | Pa-3        | Pa-3                |
| Cd 76 Ca 13             | AP 2/1   | Icosahedral | Pa-3        | Pa-3                |
| Ag 43.4 In 42.8 Eu 13.8 | AP 2/1   | Icosahedral | Pa-3        | Pa-3                |

## Element features

Table S2: 58 element features that were used to calculate the compositional descriptors. The dataset is accessible at our open-source software XenonPy [2].

| Feature ID                    | Description                                                                                       | Unit                              | Reference |
|-------------------------------|---------------------------------------------------------------------------------------------------|-----------------------------------|-----------|
| atomic_number                 | Atomic number                                                                                     |                                   |           |
| atomic_radius                 | Atomic radius                                                                                     | pm                                | [3,4]     |
| atomic_radius_rahm            | Atomic radius by Rahm et al.                                                                      | pm                                | [4-6]     |
| atomic_volume                 | Atomic volume                                                                                     | cm <sup>3</sup> mol <sup>-1</sup> | [4]       |
| atomic_weight                 | Atomic weight                                                                                     |                                   | [4,7,8]   |
| boiling_point                 | Boiling temperature                                                                               | K                                 | [4]       |
| bulk_modulus                  | Bulk modulus                                                                                      | GPa                               | [9]       |
| c6_gb                         | C_6 dispersion coefficient in a.u. (Gould & Bučko)                                                | a.u.                              | [4,10,11] |
| covalent_radius_cordero       | Covalent radius by Cordero et al.                                                                 | pm                                | [4,12]    |
| covalent_radius_pyykko        | Single bond covalent radius by Pyykko et al.                                                      | pm                                | [4,13]    |
| covalent_radius_pyykko_double | Double bond covalent radius by Pyykko et al.                                                      | pm                                | [4,14]    |
| covalent_radius_pyykko_triple | Triple bond covalent radius by Pyykko et al.                                                      | pm                                | [4,15]    |
| covalent_radius_slater        | Covalent radius by Slater                                                                         | pm                                | [3]       |
| density                       | Density at 295K                                                                                   | g cm <sup>3</sup>                 | [4]       |
| dipole_polarizability         | Dipole polarizability                                                                             | a.u.,                             | [4,16]    |
| electron_negativity           | Pauling electronegativity                                                                         |                                   | [17]      |
| electron_affinity             | Electron affinity                                                                                 | eV                                | [4,18,19] |
| en_allen                      | Allen's scale of electronegativity                                                                | eV                                | [4,20,21] |
| en_ghosh                      | Ghosh's scale of electronegativity                                                                |                                   | [4,22]    |
| en_pauling                    | Pauling's scale of electronegativity                                                              |                                   | [4,18]    |
| first_ion_en                  | First ionization energy                                                                           | eV                                | [18]      |
| fusion_enthalpy               | Enthalpy of fusion for elements at their melting temperatures                                     | kJ mol <sup>-1</sup>              | [18]      |
| gs_bandgap                    | DFT bandgap energy of T=0K ground state                                                           | eV                                | [23,24]   |
| gs_energy                     | DFT energy per atom (raw VASP value) of T=0K ground state                                         | eV atom <sup>-1</sup>             | [23,24]   |
| gs_est_bcc_latcnt             | Estimated BCC lattice parameter based on the DFT volume of the OQMD ground state for each element |                                   | [23,24]   |
| gs_est_fcc_latcnt             | Estimated FCC lattice parameter based on the DFT volume of the OQMD ground state for each element | Å                                 | [23,24]   |
| gs_mag_moment                 | DFT magnetic moment of T=0K ground state                                                          |                                   | [23,24]   |
| gs_volume_per                 | DFT volume per atom of T=0K ground state                                                          | Å <sup>3</sup> atom <sup>-1</sup> | [23,24]   |
| hhi_p                         | HerfindahlHirschman Index (HHI) production values                                                 |                                   | [25]      |
| hhi_r                         | HerfindahlHirschman Index (HHI) reserves values                                                   |                                   | [25]      |

Table S2 continued

| Feature ID           | Description                                   | Unit                                | Reference   |
|----------------------|-----------------------------------------------|-------------------------------------|-------------|
| heat_capacity_mass   | Specific heat capacity at STP <sup>1</sup>    | J mol <sup>-1</sup> K <sup>-1</sup> | [18]        |
| heat_capacity_molar  | Molar heat capacity at STP                    | J mol <sup>-1</sup> K <sup>-1</sup> | [18]        |
| icsd_volume          | Volume per atom of ICSD phase at STP          |                                     | [26–28]     |
| evaporation_heat     | Evaporation heat                              | kJ mol <sup>-1</sup>                | [4]         |
| heat_of_formation    | Heat of formation                             | kJ mol <sup>-1</sup>                | [4]         |
| lattice_constant     | Lattice constant                              | Å                                   | [4]         |
| mendeleev_number     | Mendeleev's number                            |                                     | [4, 29, 30] |
| melting_point        | Melting temperature                           | K                                   | [4]         |
| molar_volume         | Molar volume                                  | L mol <sup>-1</sup>                 | [9]         |
| num_unfilled         | Number of unfilled valence orbitals           |                                     | [31, 32]    |
| num_valance          | Number of valence electrons                   |                                     | [31, 32]    |
| num_d_unfilled       | Number of unfilled d valence orbitals         |                                     | [31, 32]    |
| num_d_valance        | Number of filled d valence orbitals           |                                     | [31, 32]    |
| num_f_unfilled       | Number of unfilled f valence orbitals         |                                     | [31, 32]    |
| num_f_valance        | Number of filled f valence orbitals           |                                     | [31, 32]    |
| num_p_unfilled       | Number of unfilled p valence orbitals         |                                     | [31, 32]    |
| num_p_valance        | Number of filled p valence orbitals           |                                     | [31, 32]    |
| num_s_unfilled       | Number of unfilled s valence orbitals         |                                     | [31, 32]    |
| num_s_valance        | Number of filled s valence orbitals           |                                     | [31, 32]    |
| period               | Period in periodic table                      |                                     | [4]         |
| specific_heat        | Specific heat at 20 °C                        | J g <sup>-1</sup> mol <sup>-1</sup> | [4]         |
| thermal_conductivity | Thermal conductivity at 25 °C                 | W m <sup>-1</sup> K <sup>-1</sup>   | [4]         |
| vdw_radius           | van der Waals radius                          | pm                                  | [4, 18]     |
| vdw_radius_alvarez   | van der Waals radius according to Alvarez     | pm                                  | [4, 33]     |
| vdw_radius_mm3       | van der Waals radius from the MM3 FF          | pm                                  | [4, 34]     |
| vdw_radius_uff       | van der Waals radius from the UFF             | pm                                  | [4, 35]     |
| sound_velocity       | Velocity of sound                             | m s <sup>-1</sup>                   | [9]         |
| polarizability       | Static average electric dipole polarizability | 10 <sup>-24</sup> cm <sup>3</sup>   | [18]        |

<sup>1</sup>Standard Temperature and Pressure

## Generalization ability of the model

Table S3: Prediction performance for the three-class classification problem of stable quasicrystals (QC), approximants (AC), and others. The left table is the confusion matrix, and the right table reports the per-class recall, precision, and  $F_1$  metrics. The performance metrics were averaged over 100 different bootstrap sets, and the numbers in parentheses represent the standard deviations. The results labeled as “with AI systems” are the same as we report in [Table 1](#). Additionally, in the “without AI systems” panel, we show the results of the performance evaluation after eliminating the aluminum-containing compositions from the test instances.

|            |                    | Predicted class |              |              | Performance metrics |           |               |               |               |
|------------|--------------------|-----------------|--------------|--------------|---------------------|-----------|---------------|---------------|---------------|
|            |                    | QC              | AC           | others       | Recall              | Precision | $F_1$         |               |               |
| True class | With AI systems    | QC              | 9.63 (1.641) | 3.24 (1.342) | 3.13 (1.189)        | QC        | 0.602 (0.103) | 0.722 (0.090) | 0.650 (0.076) |
|            |                    | AC              | 3.11 (1.555) | 9.73 (1.805) | 3.16 (1.573)        | AC        | 0.608 (0.113) | 0.731 (0.089) | 0.658 (0.088) |
|            |                    | others          | 0.76 (0.896) | 0.42 (0.619) | 2016.82 (1.024)     | others    | 0.999 (0.001) | 0.997 (0.001) | 0.998 (0.001) |
|            | Without AI systems | QC              | 7.14 (1.594) | 1.91 (1.150) | 1.90 (1.221)        | QC        | 0.662 (0.140) | 0.807 (0.125) | 0.715 (0.102) |
|            |                    | AC              | 1.43 (1.185) | 7.68 (1.788) | 2.36 (1.389)        | AC        | 0.671 (0.137) | 0.792 (0.110) | 0.720 (0.108) |
|            |                    | others          | 0.45 (0.698) | 0.16 (0.367) | 1900.13 (8.795)     | others    | 1.000 (0.000) | 0.998 (0.001) | 0.999 (0.001) |

## Prediction accuracy sensitivity

Table S4: The sensitivity of the prediction accuracy when using the different sample sizes of periodic crystals ( $N_{\text{crystal}}$ ). The left table is the confusion matrix, and the right table reports the per-class recall, precision, and  $F_1$  metrics. The performance metrics were averaged over 100 different bootstrap sets, and the numbers in parentheses represent the standard deviations.

|            |        | Predicted class      |              |              | Performance metrics |        |               |               |               |
|------------|--------|----------------------|--------------|--------------|---------------------|--------|---------------|---------------|---------------|
|            |        | $N_{\text{crystal}}$ | QC           | AC           | others              | Recall | Precision     | $F_1$         |               |
| True class | 500    | QC                   | 11.08 (2.58) | 3.58 (1.97)  | 0.88 (1.04)         | QC     | 0.719 (0.121) | 0.736 (0.107) | 0.719 (0.086) |
|            |        | AC                   | 3.48 (1.75)  | 10.75 (2.98) | 1.13 (1.12)         | AC     | 0.701 (0.125) | 0.735 (0.127) | 0.708 (0.096) |
|            |        | others               | 0.61 (0.84)  | 0.35 (0.64)  | 118.14 (4.25)       | others | 0.992 (0.009) | 0.983 (0.012) | 0.988 (0.007) |
|            | 2,500  | QC                   | 9.90 (3.10)  | 3.65 (1.80)  | 2.19 (1.44)         | QC     | 0.627 (0.132) | 0.718 (0.120) | 0.661 (0.109) |
|            |        | AC                   | 3.48 (1.82)  | 9.88 (2.59)  | 2.03 (1.38)         | AC     | 0.645 (0.120) | 0.708 (0.107) | 0.668 (0.093) |
|            |        | others               | 0.38 (0.61)  | 0.49 (0.67)  | 518.00 (4.82)       | others | 0.998 (0.002) | 0.992 (0.004) | 0.995 (0.002) |
|            | 5,000  | QC                   | 9.96 (2.83)  | 3.47 (1.77)  | 2.40 (1.41)         | QC     | 0.627 (0.123) | 0.756 (0.128) | 0.677 (0.102) |
|            |        | AC                   | 2.95 (1.81)  | 9.67 (2.75)  | 2.84 (1.68)         | AC     | 0.631 (0.124) | 0.704 (0.120) | 0.655 (0.096) |
|            |        | others               | 0.37 (0.67)  | 0.66 (0.78)  | 1017.68 (4.86)      | others | 0.999 (0.001) | 0.995 (0.002) | 0.997 (0.001) |
|            | 10,000 | QC                   | 9.73 (2.75)  | 3.17 (1.62)  | 3.02 (1.68)         | QC     | 0.609 (0.135) | 0.758 (0.127) | 0.666 (0.112) |
|            |        | AC                   | 2.68 (1.70)  | 8.54 (2.33)  | 3.67 (1.98)         | AC     | 0.584 (0.127) | 0.694 (0.112) | 0.623 (0.091) |
|            |        | others               | 0.50 (0.70)  | 0.72 (0.83)  | 2017.97 (5.19)      | others | 0.999 (0.001) | 0.997 (0.001) | 0.998 (0.001) |
|            | 15,000 | QC                   | 9.47 (2.94)  | 3.33 (2.04)  | 3.49 (1.58)         | QC     | 0.582 (0.133) | 0.736 (0.113) | 0.641 (0.105) |
|            |        | AC                   | 2.90 (1.66)  | 8.46 (2.22)  | 4.65 (2.44)         | AC     | 0.536 (0.123) | 0.663 (0.127) | 0.581 (0.098) |
|            |        | others               | 0.49 (0.69)  | 1.18 (1.03)  | 3016.03 (4.84)      | others | 0.999 (0.000) | 0.997 (0.001) | 0.998 (0.001) |
|            | 20,000 | QC                   | 9.39 (2.69)  | 2.85 (1.89)  | 3.92 (2.12)         | QC     | 0.585 (0.128) | 0.739 (0.118) | 0.643 (0.101) |
|            |        | AC                   | 2.74 (1.68)  | 8.80 (2.68)  | 4.78 (2.53)         | AC     | 0.548 (0.133) | 0.688 (0.136) | 0.597 (0.107) |
|            |        | others               | 0.64 (0.83)  | 1.26 (1.08)  | 4015.62 (5.11)      | others | 1.000 (0.000) | 0.998 (0.001) | 0.999 (0.000) |
|            | 25,000 | QC                   | 9.29 (2.68)  | 2.64 (1.57)  | 3.83 (1.77)         | QC     | 0.593 (0.122) | 0.728 (0.138) | 0.644 (0.107) |
|            |        | AC                   | 2.84 (1.77)  | 7.70 (2.27)  | 5.75 (2.51)         | AC     | 0.479 (0.129) | 0.677 (0.133) | 0.550 (0.116) |
|            |        | others               | 0.71 (0.85)  | 1.16 (1.08)  | 5016.08 (4.96)      | others | 1.000 (0.000) | 0.998 (0.001) | 0.999 (0.000) |
|            | 30,000 | QC                   | 9.45 (2.77)  | 2.65 (1.61)  | 4.20 (1.83)         | QC     | 0.583 (0.123) | 0.750 (0.117) | 0.648 (0.102) |
|            |        | AC                   | 2.32 (1.39)  | 7.37 (2.30)  | 5.66 (2.47)         | AC     | 0.483 (0.122) | 0.642 (0.145) | 0.542 (0.113) |
|            |        | others               | 0.83 (0.93)  | 1.45 (1.19)  | 6016.07 (4.79)      | others | 1.000 (0.000) | 0.998 (0.000) | 0.999 (0.000) |

## Phase diagram

Figure S1: Predicted and experimentally determined phase diagrams for the 30 Al-TM-TM alloy systems. For each system, the left panel shows the predicted diagram made by the random forest classifier, and the right panel shows the actual phase diagram extracted from the literature. Three different colors are used to distinguish the phase region of quasicrystals, approximants, and others.

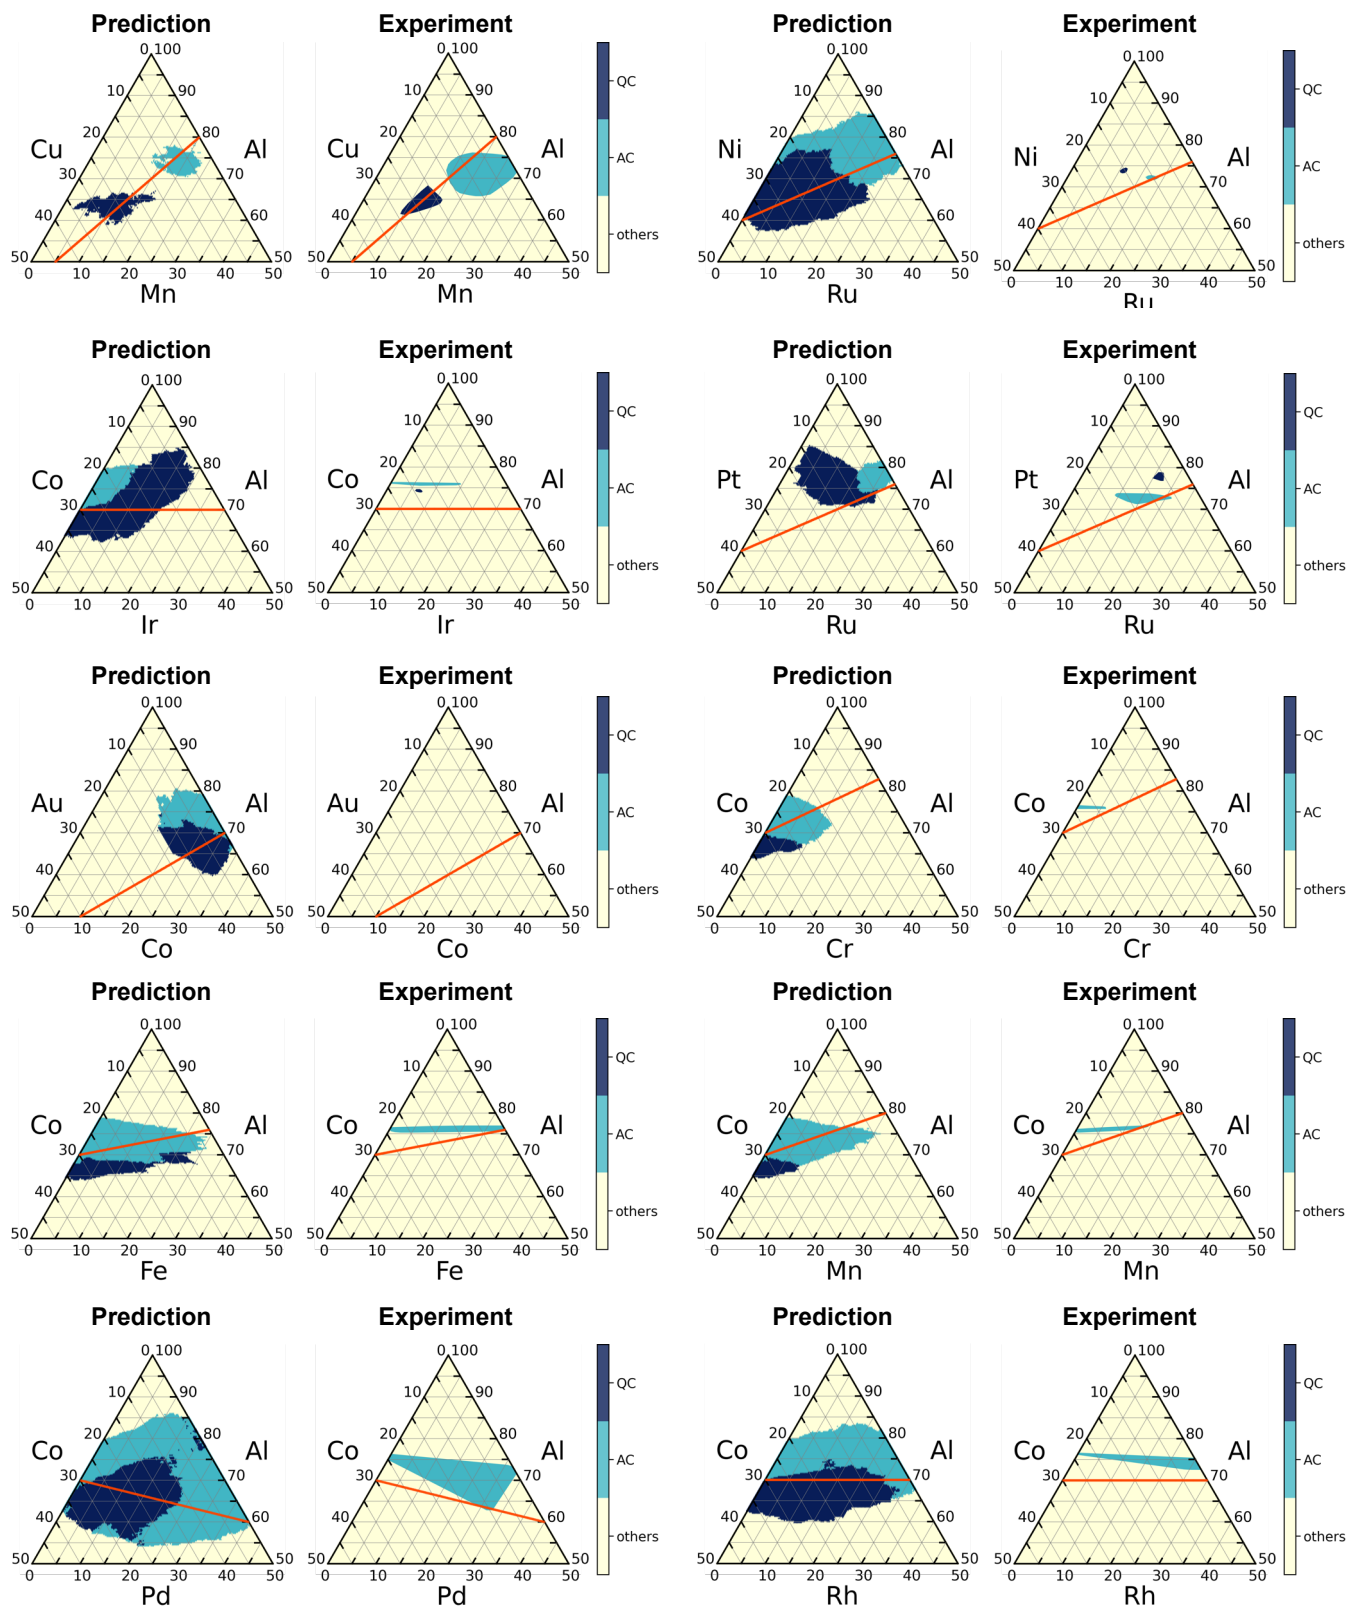



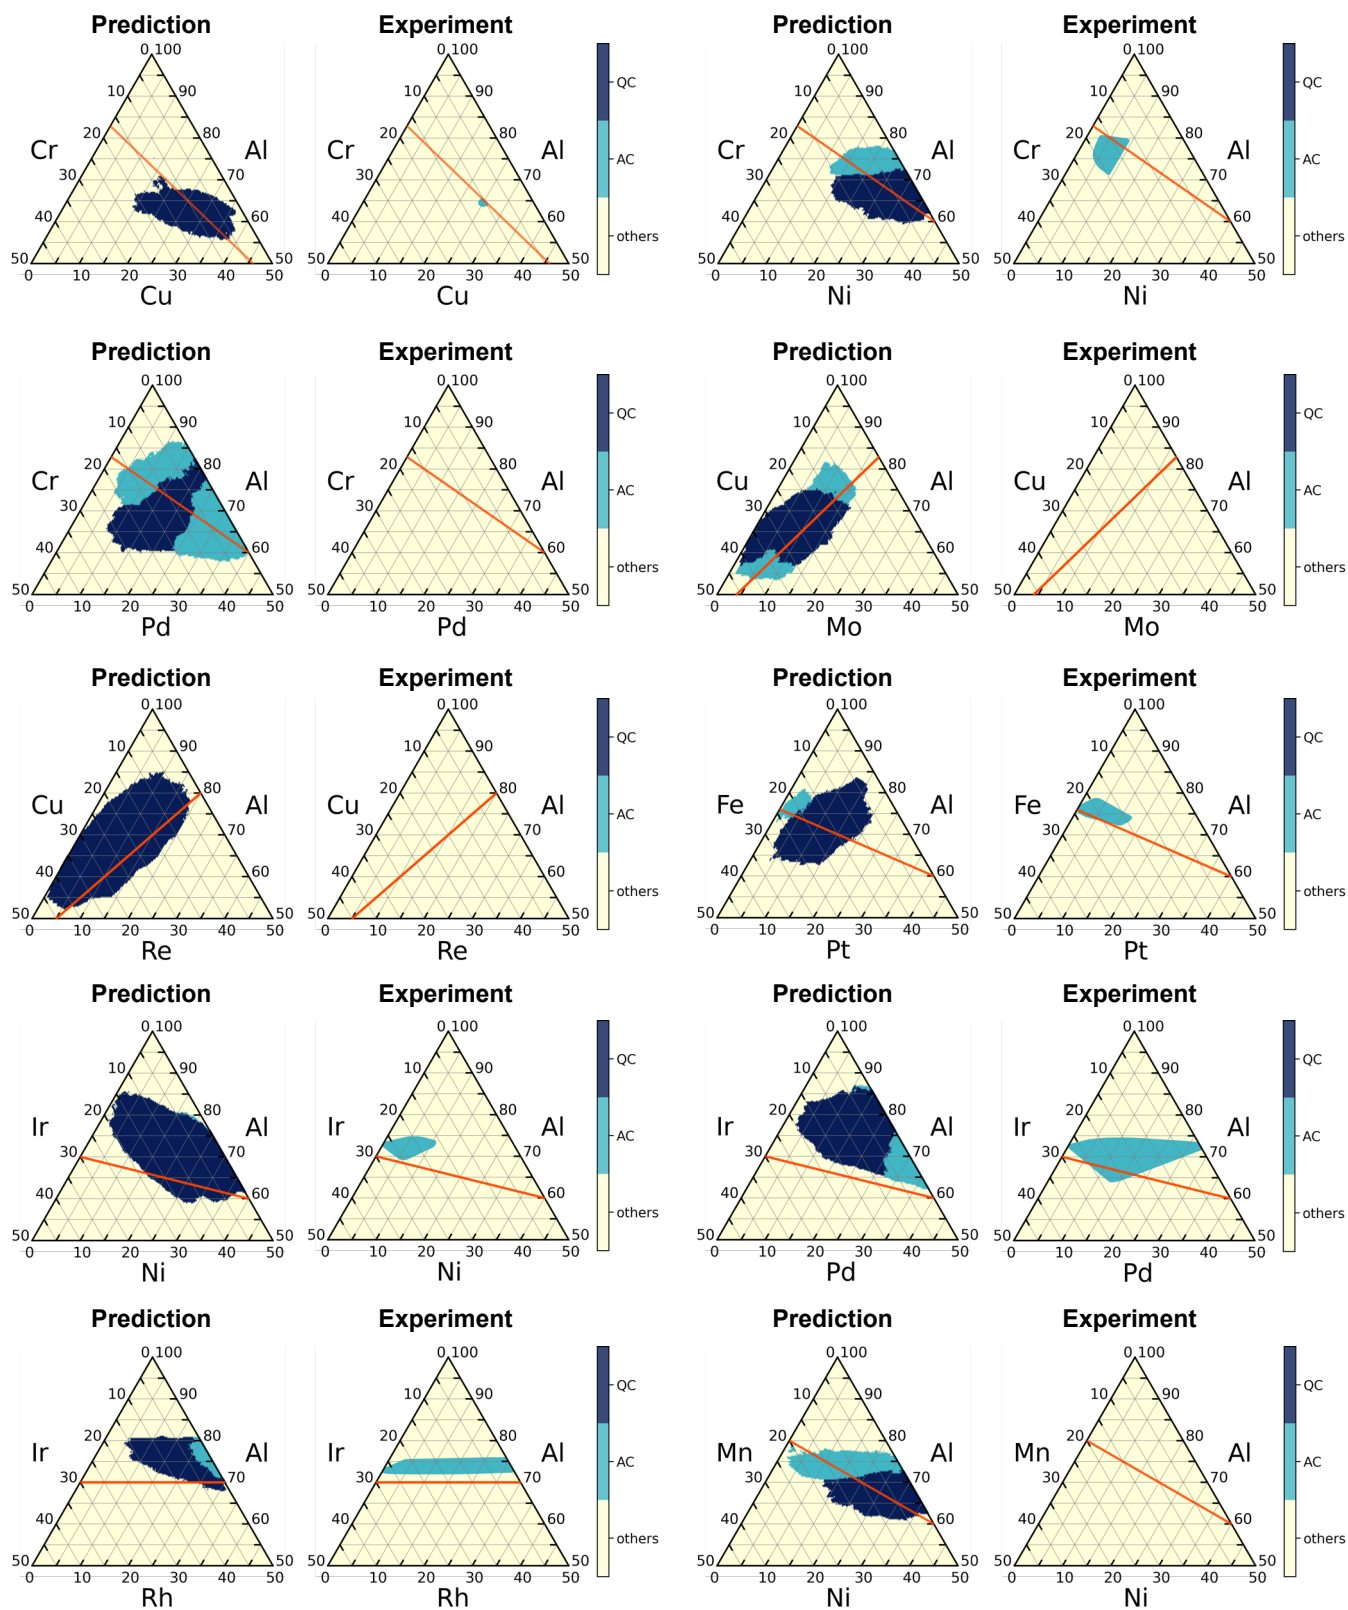



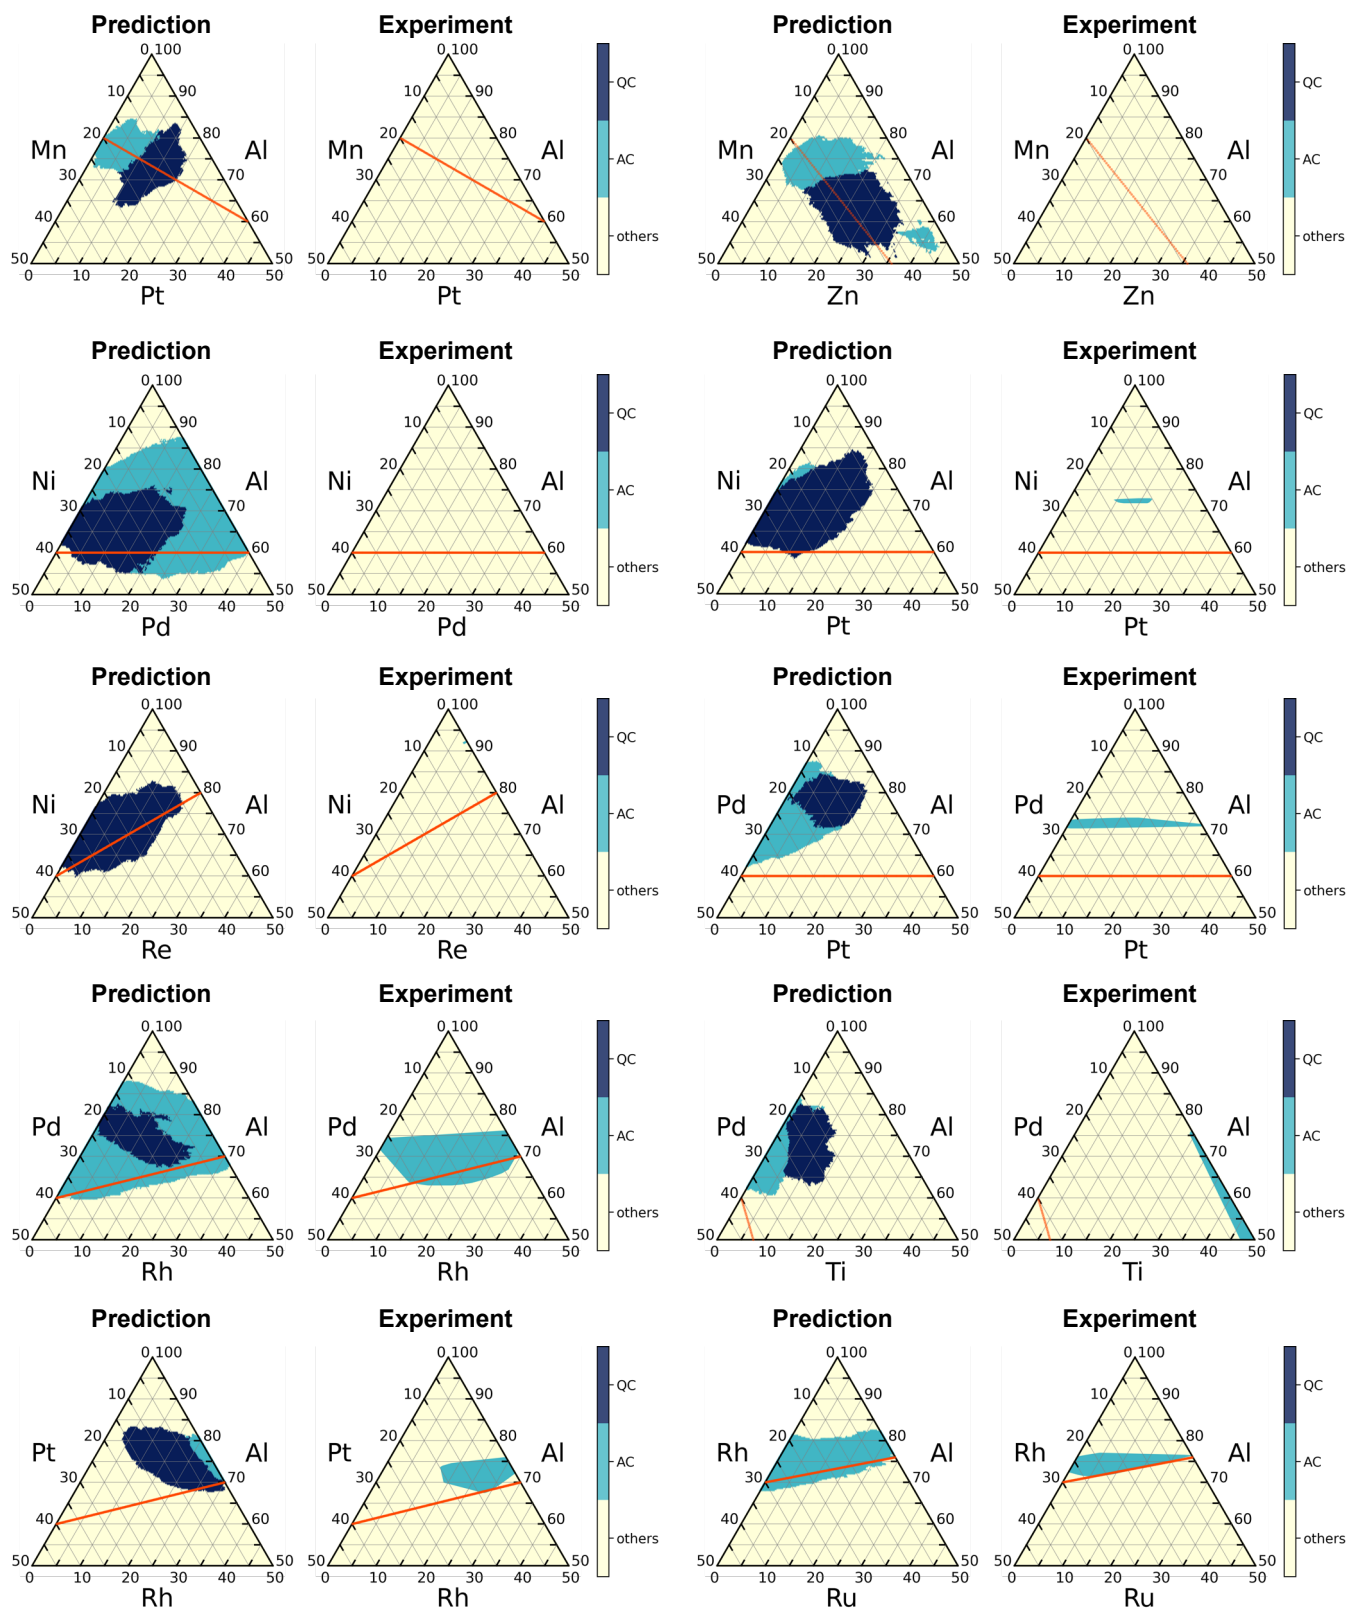

## Machine learning learned rules

Figure S2: The formation rules of QC/AC discovered by the machine learning algorithm are overwritten on the predicted phase diagrams of the 30 Al-TM-TM systems. A color-coded line represents a condition imposed on the weighted average of van der Waals radius, electronegativity, first ionisation energy, the number of filled p valence orbitals, or the energy per atom at T=0K ground state.

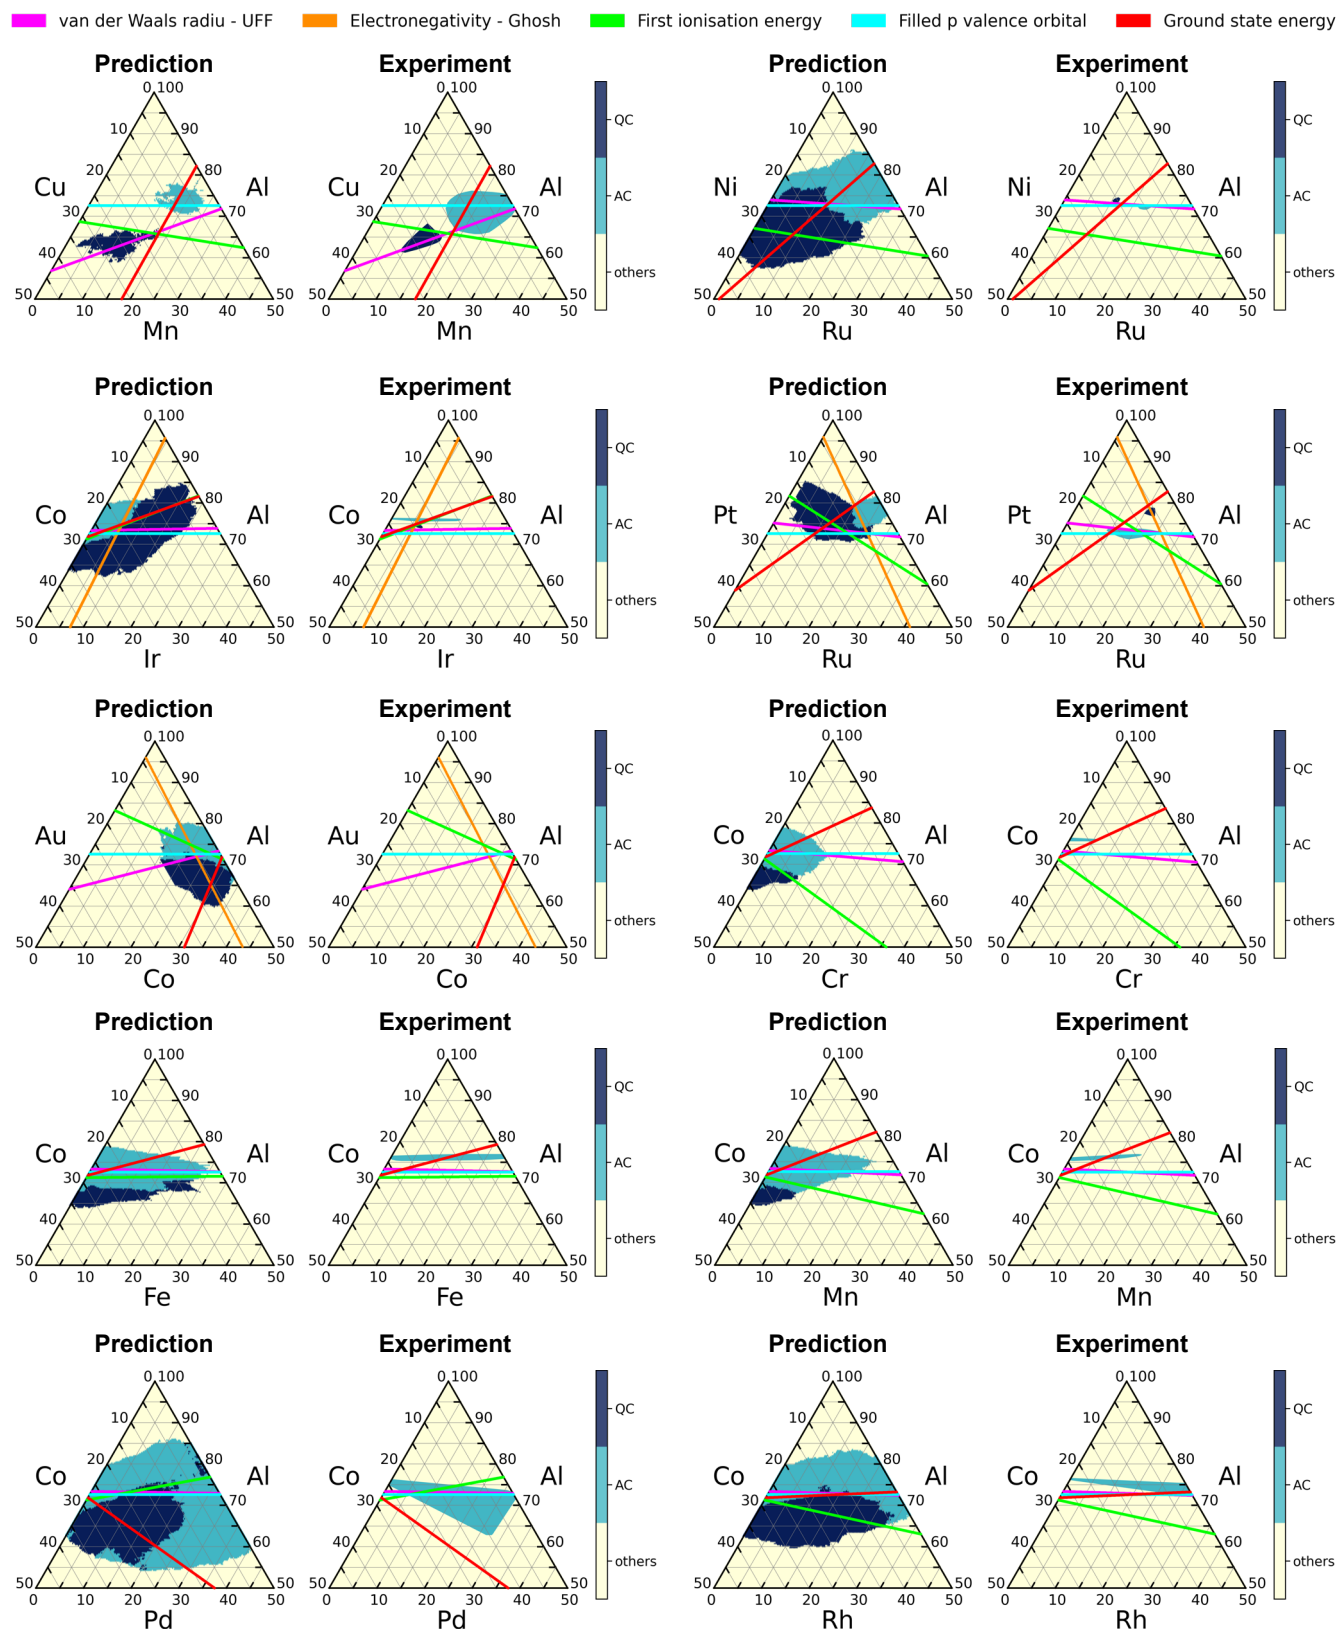

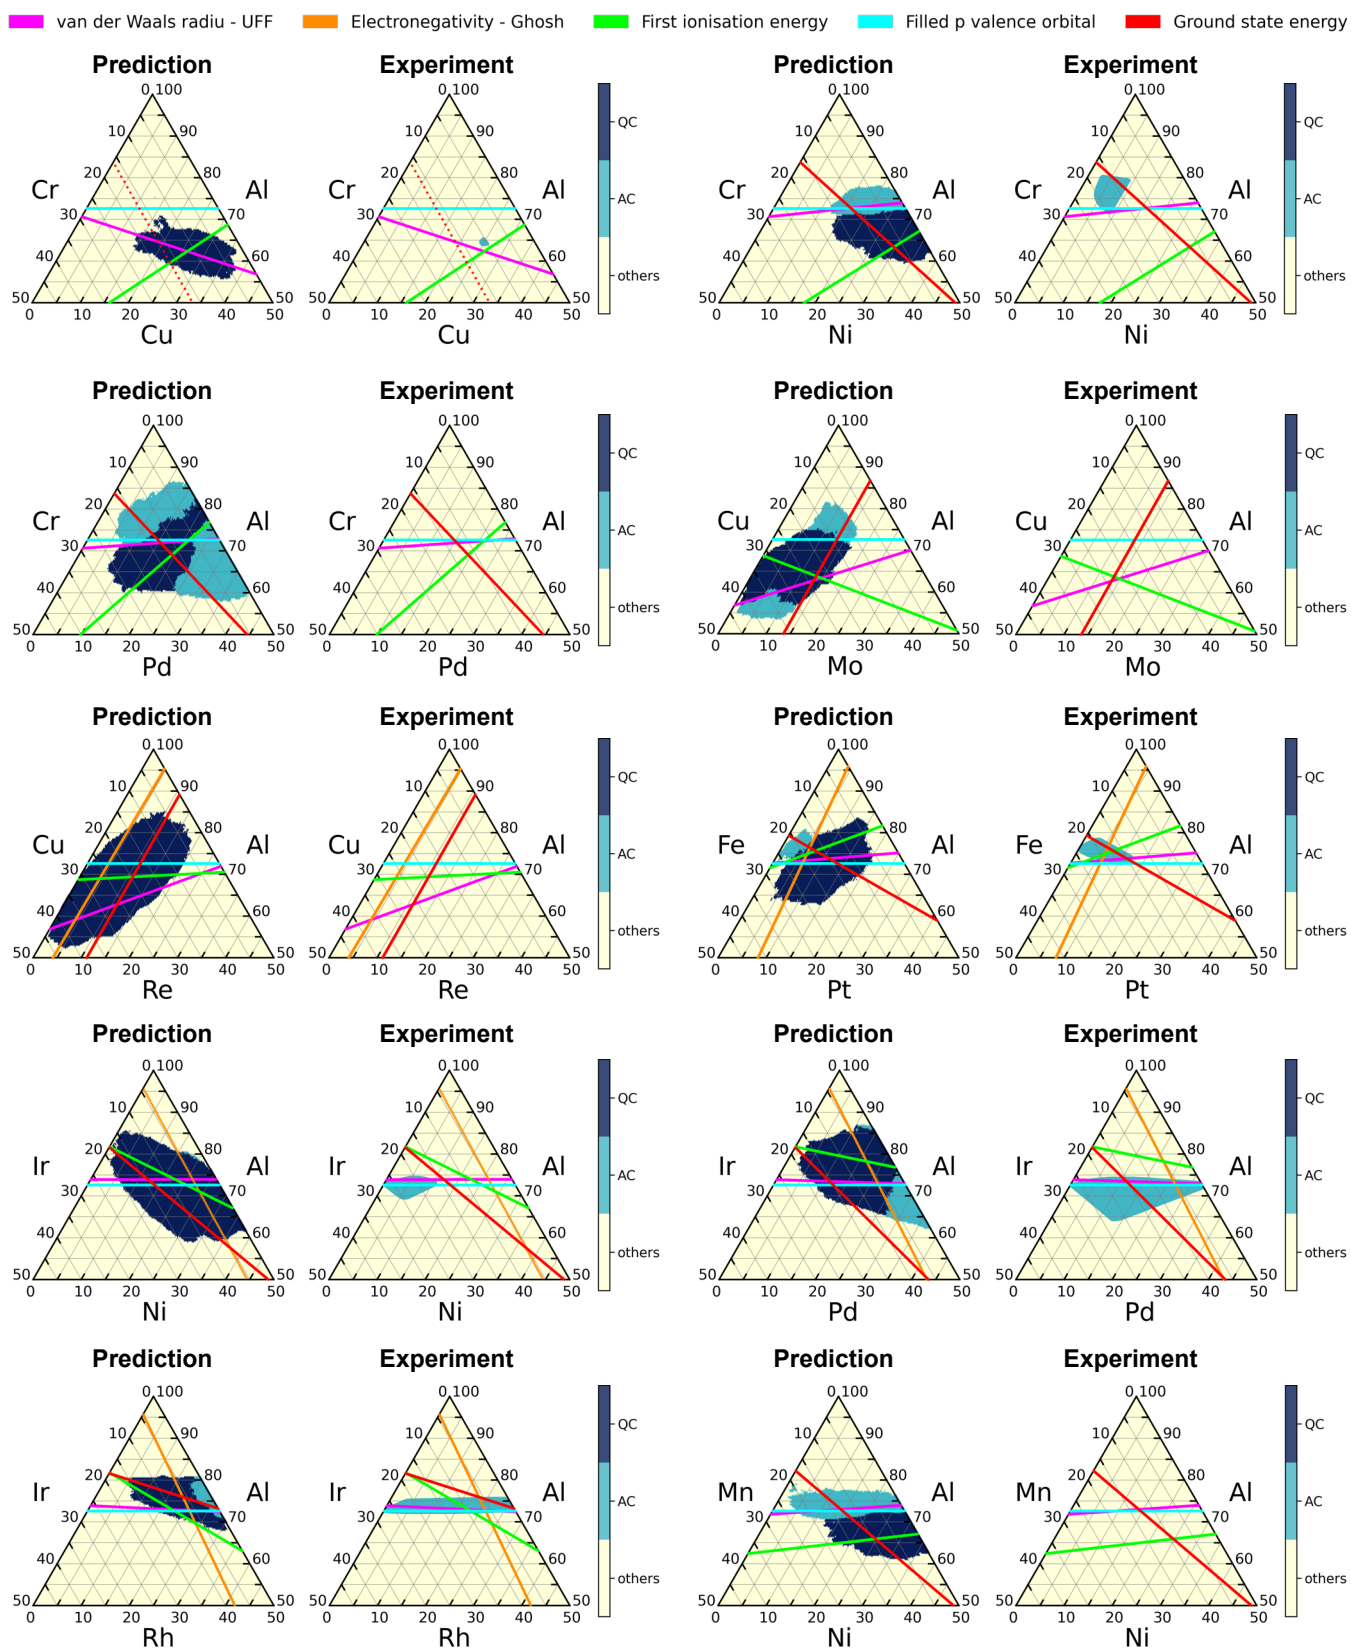

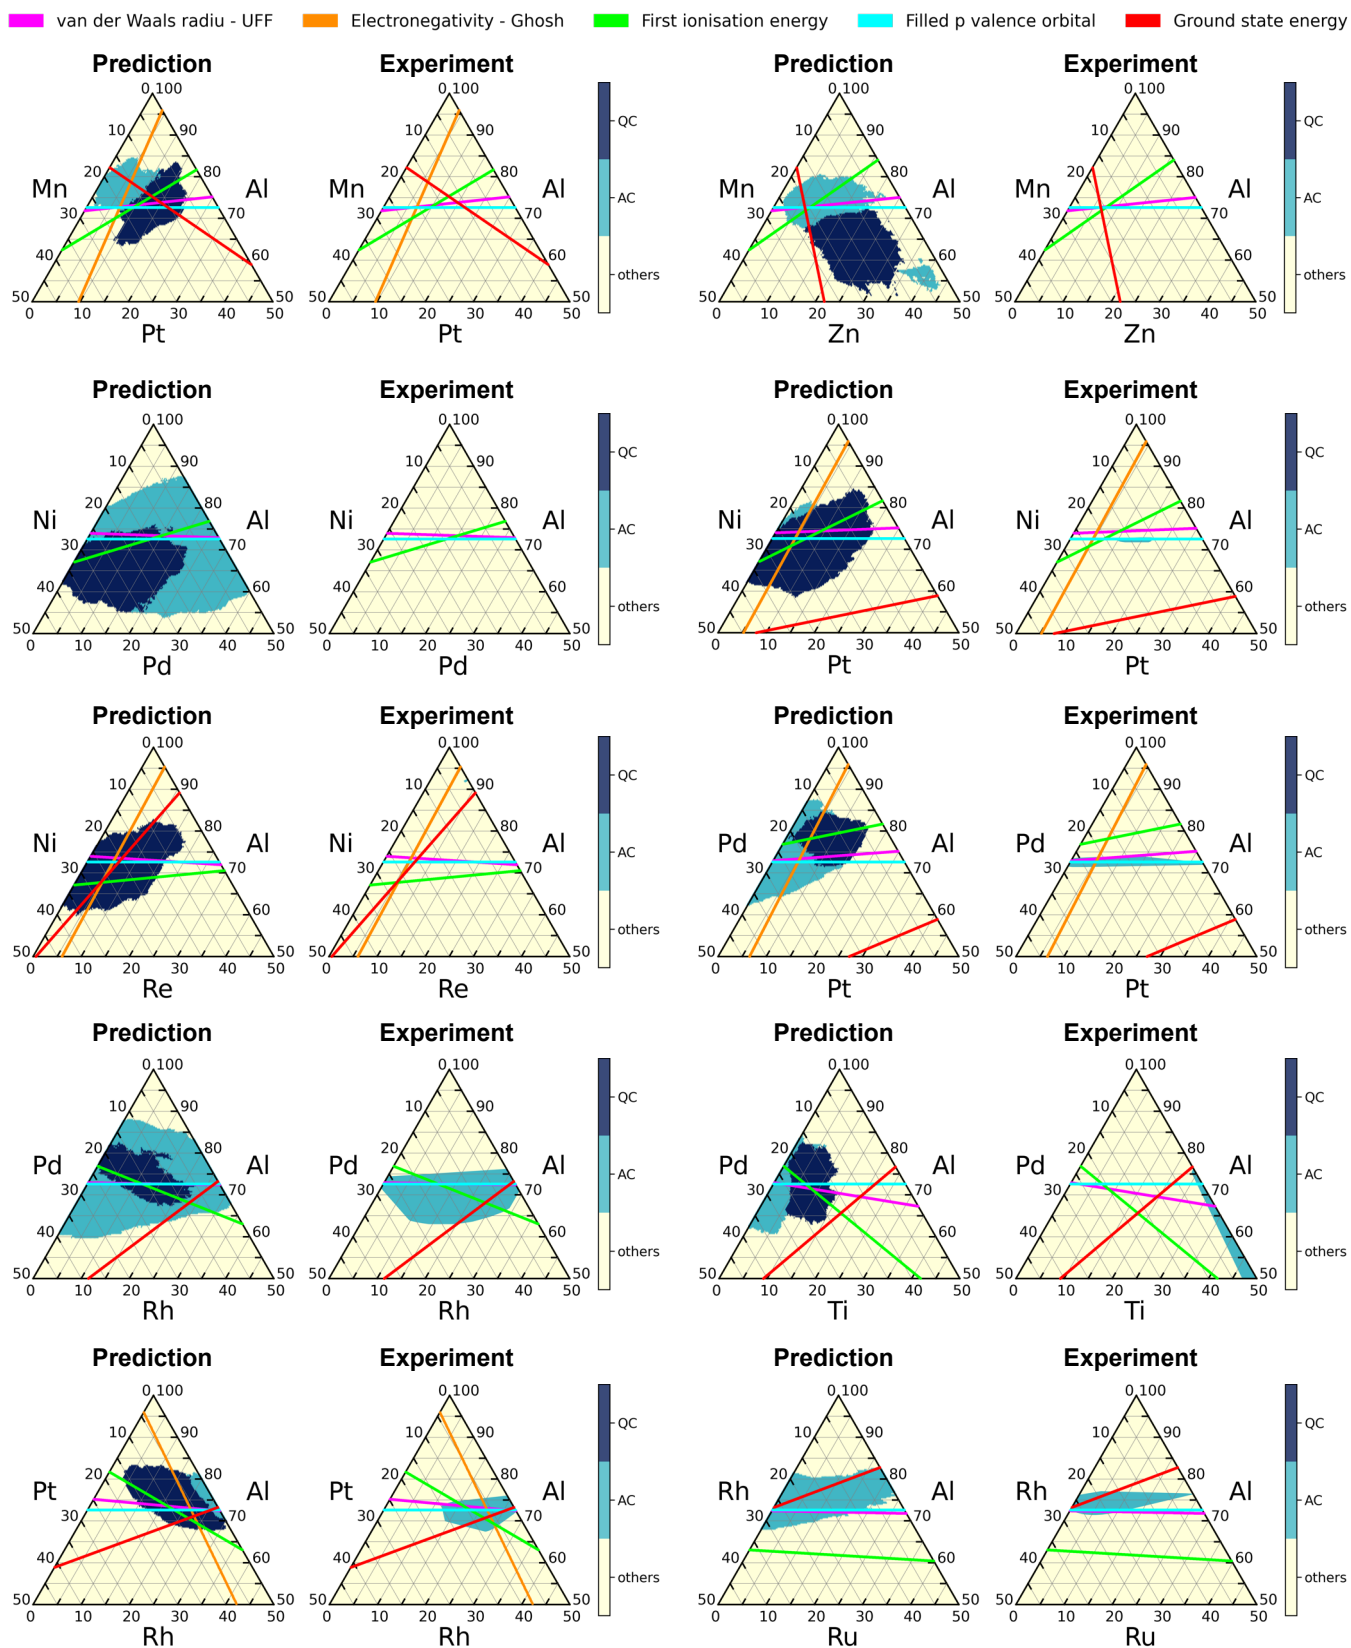

## References

- [1] S. Walter, S. Deloudi, *Crystallography of Quasicrystals*, volume 126 of *Springer Series in Materials Science*, Springer Berlin Heidelberg, Berlin, Heidelberg, **2009**.
- [2] Xenonpy platform, <https://github.com/yoshida-lab/XenonPy>, Accessed: 2021-4-30.
- [3] J. C. Slater, *J. Chem. Phys.* **1964**, *41*, 10 3199.
- [4] mendeleev – a python resource for properties of chemical elements, ions and isotopes, ver. 0.3.6, <https://github.com/lmmentel/mendeleev>, Accessed: 2021-4-30.
- [5] M. Rahm, R. Hoffmann, N. W. Ashcroft, *Chem. Eur. J.* **2016**, *22*, 41 14625.
- [6] M. Rahm, R. Hoffmann, N. W. Ashcroft, *Chem. Eur. J.* **2017**, *23*, 16 4017.
- [7] J. Vogt, S. Alvarez, *Inorg. Chem.* **2014**, *53*, 17 9260.
- [8] J. Meija, T. B. Coplen, M. Berglund, W. A. Brand, P. De Bièvre, M. Gröning, N. E. Holden, J. Irgeher, R. D. Loss, T. Walczyk, T. Prohaska, *Pure Appl. Chem.* **2016**, *88*, 3 265.
- [9] S. P. Ong, W. D. Richards, A. Jain, G. Hautier, M. Kocher, S. Cholia, D. Gunter, V. L. Chevrier, K. A. Persson, G. Ceder, *Comput. Mater. Sci.* **2013**, *68* 314.
- [10] K. T. Tang, J. M. Norbeck, P. R. Certain, *J. Chem. Phys.* **1976**, *64*, 7 3063.
- [11] X. Chu, A. Dalgarno, *J. Chem. Phys.* **2004**, *121*, 9 4083.
- [12] B. Cordero, V. Gómez, A. E. Platero-Prats, M. Revés, J. Echeverría, E. Cremades, F. Barragán, S. Alvarez, *Dalt. Trans.* **2008**, 2832.
- [13] P. Pyykkö, M. Atsumi, *Chem. Eur. J.* **2009**, *15*, 46 12770.
- [14] P. Pyykkö, M. Atsumi, *Chem. Eur. J.* **2009**, *15*, 1 186.
- [15] P. Pyykkö, S. Riedel, M. Patzschke, *Chem. Eur. J.* **2005**, *11*, 12 3511.
- [16] P. Schwerdtfeger, J. K. Nagle, *Mol. Phys.* **2019**, *117*, 9-12 1200.
- [17] L. Ward, A. Agrawal, A. Choudhary, C. Wolverton, *npj Comput. Mater.* **2016**, *2*, July 1.
- [18] W. M. Haynes, *CRC Handbook of Chemistry and Physics, 95th Edition*, Oakville : CRC Press, 95th ed edition, **2014**.
- [19] T. Andersen, *Phys. Rep.* **2004**, *394*, 4-5 157.
- [20] J. B. Mann, T. L. Meek, L. C. Allen, *J. Am. Chem. Soc.* **2000**, *122*, 12 2780.
- [21] J. B. Mann, T. L. Meek, E. T. Knight, J. F. Capitani, L. C. Allen, *J. Am. Chem. Soc.* **2000**, *122*, 21 5132.
- [22] D. C. Ghosh, *J. Theor. Comput. Chem.* **2005**, *04*, 01 21.
- [23] J. E. Saal, S. Kirklin, M. Aykol, B. Meredig, C. Wolverton, *JOM* **2013**, *65*, 11 1501.
- [24] S. Kirklin, J. E. Saal, B. Meredig, A. Thompson, J. W. Doak, M. Aykol, S. Rühl, C. Wolverton, *npj Comput. Mater.* **2015**, *1*, November.
- [25] M. W. Gaultois, T. D. Sparks, C. K. H. Borg, R. Seshadri, W. D. Bonificio, D. R. Clarke, *Chem. Mater.* **2013**, *25*, 15 2911.
- [26] A. Belsky, M. Hellenbrandt, V. L. Karen, P. Luksch, *Acta Crystallogr. Sect. B Struct. Sci.* **2002**, *58*, 3 364.



- [27] R. Allmann, R. Hinek, *Acta Crystallogr. Sect. A Found. Crystallogr.* **2007**, *63*, 5 412.
- [28] D. Zagorac, H. Muller, S. Ruehl, J. Zagorac, S. Rehme, *J. Appl. Crystallogr.* **2019**, *52* 918.
- [29] D. G. Pettifor, *Solid State Commun.* **1984**, *51*, 1 31.
- [30] P. Villars, K. Cenzual, J. Daams, Y. Chen, S. Iwata, *J. Alloys Compd.* **2004**, *367*, 1-2 167.
- [31] Material-agnostic platform for informatics and exploration, <https://wolverton.bitbucket.io>, Accessed: 2021-4-30.
- [32] Electron configuration of the elements, <https://periodictable.com/Properties/A/ElectronConfigurationString.v.html>, Accessed: 2021-4-30.
- [33] S. Alvarez, *Dalt. Trans.* **2013**, *42*, 24 8617.
- [34] N. L. Allinger, X. Zhou, J. Bergsma, *Theochem J. Mol. Struct.* **1994**, *312*, 1 69.
- [35] A. K. Rappe, C. J. Casewit, K. S. Colwell, W. A. Goddard, W. M. Skiff, *J. Am. Chem. Soc.* **1992**, *114*, 25 10024.
